# Supplementary material
Source: publisher figshare collection journal article supplement (https://sage.figshare.com/ndownloader/files/19255805)
Supplement: Supplementary file 1 [file 19255805]

## Appendix A. Mail Survey Characteristics

| Variable                                                                                                                                                                                                                  | Values                                                                                                                                                         | Notes                                                                                                                                                                                                                                                                                                                                                                         |
|---------------------------------------------------------------------------------------------------------------------------------------------------------------------------------------------------------------------------|----------------------------------------------------------------------------------------------------------------------------------------------------------------|-------------------------------------------------------------------------------------------------------------------------------------------------------------------------------------------------------------------------------------------------------------------------------------------------------------------------------------------------------------------------------|
| <i>Information about the survey booklet</i>                                                                                                                                                                               |                                                                                                                                                                |                                                                                                                                                                                                                                                                                                                                                                               |
| Survey version                                                                                                                                                                                                            | 0=MA-PD<br>1=MA-only                                                                                                                                           | Some plans had both an MA-only and an MA-PD survey version; both versions were reviewed and coded.                                                                                                                                                                                                                                                                            |
| Placement of instructions to beneficiary for completing the survey                                                                                                                                                        | 0=on separate page<br>1=top of first page of survey                                                                                                            |                                                                                                                                                                                                                                                                                                                                                                               |
| Whether additional market names for the plan were displayed on the back of the survey                                                                                                                                     | 0=No<br>1=Yes                                                                                                                                                  |                                                                                                                                                                                                                                                                                                                                                                               |
| Number of pages                                                                                                                                                                                                           | Count                                                                                                                                                          |                                                                                                                                                                                                                                                                                                                                                                               |
| Attractiveness (assessment of mail survey booklet for respondent friendly design based on use of color, visual cues to distinguish survey questions from response options, use of white space, and clear navigation cues) | 4=most respondent friendly design<br>3=second most respondent friendly design<br>2=third most respondent friendly design<br>1=least respondent friendly design | Survey templates were arrayed and most and least respondent friendly designs were identified. Remaining templates were rank ordered in comparison to the most/least respondent friendly. Approach resulted in four numeric values for coding (1-4). All vendor mail survey booklets were reviewed and assigned to one of the four categories. See Appendix B for more detail. |
| Number of supplemental items                                                                                                                                                                                              | Minimum value is 0, Maximum value is 12 <sup>1</sup>                                                                                                           |                                                                                                                                                                                                                                                                                                                                                                               |

<sup>1</sup> For Medicare-Medicaid Plans (MMPs), the maximum is 19 supplemental items.

| Variable                                                                                                | Values            | Notes |
|---------------------------------------------------------------------------------------------------------|-------------------|-------|
| Supplemental items included<br>one or more existing CAHPS<br>items developed by the CAHPS<br>consortium | 0=No<br><br>1=Yes |       |
| Supplemental items included<br>one or more non-CAHPS items                                              | 0=No<br><br>1=Yes |       |
| Any open-ended supplemental<br>items (free response rather than<br>choice of response options)          | 0=No<br><br>1=Yes |       |

## **Appendix B. Description of Respondent Friendly Survey Design and Coding of Attractiveness**

The “attractiveness” variable provides an assessment of a given mail survey booklet for “respondent friendly design” based on the principles established by Dillman as influencing response rates and quality of data: use of color, presence of visual cues to distinguish survey questions from response options, presence and use of white space to help the respondent distinguish questions, and clear navigation cues.<sup>12</sup>

Survey templates were arrayed and most and least respondent friendly designs were identified, and the features of those templates were codified for use in coding the survey attractiveness variable. Vendors were required to use a minimum of 11-point font and no vendor used font larger than 12-point. In addition, all survey templates had similar page margins (side, top, bottom) due to use of scanning software for data entry and similar requirements for page margins across such software. As a result, font size and page margins were not factors in the development of our coding scheme for survey templates.

### *Features of the most respondent friendly design (Attractiveness = 1)*

- Use of accent color
- Additional navigation cues to call out section headings
- More than one blank line between survey questions
- White space between survey question-response option block is larger than white space between a survey question and response options associated with the question
- One or more blank lines between end of survey question and start of response options
- A line or other demarcation between columns of survey questions
- Visible or extra white space on the survey page

### *Features of the least respondent friendly design (Attractiveness = 4)*

- No use of color; black and white only
- No additional navigation cues to call out section headings

---

<sup>1</sup> Dillman, D. A., Sinclair, M. D., & Clark, J. R. (1993). Effects of questionnaire length, respondent-friendly design, and a difficult question on response rates for occupant-addressed census mail surveys. *Public Opinion Quarterly*, 57(3), 289-304.

<sup>2</sup> Dillman, D. A., Smyth, J. D., & Christian, L. M. (2014). *Internet, phone, mail, and mixed-mode surveys: the tailored design method*. John Wiley & Sons.

- No blank lines between survey questions
- No blank lines between end of survey question and start of response options
- No line or other demarcation between columns of survey questions
- No visible or extra white space on the survey page

After defining the anchors of the attractiveness scale, the remaining surveys were ordered based on the respondent friendliness of the survey template in comparison to the most/least respondent friendly templates. This approach resulted in four numeric values for coding (1-4). All vendor mail survey booklets were reviewed and assigned to one of the four categories.

*Features of the second most respondent friendly design (Attractiveness = 2)*

- May use accent color
- No additional navigation cues to call out section headings
- One blank line between survey questions
- White space between survey question-response option block is larger than white space between a survey question and response options associated with the question
- One-half to one blank line between end of survey question and start of response options
- A line or other demarcation between columns of survey questions
- Visible or extra white space on the survey page

*Features of the third most respondent friendly design (Attractiveness = 3)*

- No use of accent color
- No additional navigation cues to call out section headings
- One-half to one blank line between survey questions
- White space between survey question-response option block is equal to white space between a survey question and response options associated with the question
- One-half to one blank line between end of survey question and start of response options
- A line or other demarcation between columns of survey questions

**Appendix C. Variation of Survey Characteristics by Vendor (# of Surveys)**

|                                                   | Vendor 1 |             | Vendor 2 |             | Vendor 3 |             | Vendor 4 |             | Vendor 5 |             | Vendor 6 |             | Total |             |
|---------------------------------------------------|----------|-------------|----------|-------------|----------|-------------|----------|-------------|----------|-------------|----------|-------------|-------|-------------|
|                                                   | MA-PD    | MA-<br>Only | MA-PD | MA-<br>Only |
| <b><i>Placement of Survey Instructions</i></b>    |          |             |          |             |          |             |          |             |          |             |          |             |       |             |
| On a separate page                                | 30       | 0           | 16       | 0           | 172      | 64          | 91       | 24          | 116      | 34          | 2        | 2           | 427   | 124         |
| Top of first page of the survey                   | 0        | 8           | 0        | 0           | 0        | 0           | 0        | 0           | 0        | 0           | 0        | 0           | 0     | 8           |
| <b><i>Survey Attractiveness</i></b>               |          |             |          |             |          |             |          |             |          |             |          |             |       |             |
| 4 -- Most attractive                              | 30       | 8           | 0        | 0           | 0        | 0           | 0        | 0           | 0        | 0           | 0        | 0           | 30    | 8           |
| 3                                                 | 0        | 0           | 0        | 0           | 172      | 64          | 91       | 24          | 5        | 3           | 2        | 2           | 270   | 93          |
| 2                                                 | 0        | 0           | 16       | 0           | 0        | 0           | 0        | 0           | 0        | 0           | 0        | 0           | 16    | 0           |
| 1 -- Least attractive                             | 0        | 0           | 0        | 0           | 0        | 0           | 0        | 0           | 111      | 31          | 0        | 0           | 111   | 31          |
| <b><i>Any CAHPS Supplemental Survey Items</i></b> |          |             |          |             |          |             |          |             |          |             |          |             |       |             |
| Yes                                               | 26       | 7           | 6        | 0           | 51       | 13          | 45       | 12          | 49       | 15          | 0        | 0           | 177   | 47          |
| No                                                | 1        | 0           | 1        | 0           | 0        | 0           | 37       | 7           | 5        | 0           | 0        | 0           | 44    | 7           |

|                                                             | Vendor 1 |             | Vendor 2 |             | Vendor 3 |             | Vendor 4 |             | Vendor 5 |             | Vendor 6 |             | Total |             |
|-------------------------------------------------------------|----------|-------------|----------|-------------|----------|-------------|----------|-------------|----------|-------------|----------|-------------|-------|-------------|
|                                                             | MA-PD    | MA-<br>Only | MA-PD | MA-<br>Only |
| Not applicable                                              | 3        | 1           | 9        | 0           | 121      | 51          | 9        | 5           | 62       | 19          | 2        | 2           | 206   | 78          |
| <b><i>Any Non-CAHPS<br/>Supplemental Survey Items</i></b>   |          |             |          |             |          |             |          |             |          |             |          |             |       |             |
| Yes                                                         | 22       | 7           | 4        | 0           | 43       | 12          | 74       | 18          | 37       | 13          | 0        | 0           | 180   | 50          |
| No                                                          | 5        | 0           | 3        | 0           | 8        | 1           | 8        | 1           | 17       | 2           | 0        | 0           | 41    | 4           |
| Not applicable                                              | 3        | 1           | 9        | 0           | 121      | 51          | 9        | 5           | 62       | 19          | 2        | 2           | 206   | 78          |
| <b><i>Any Open-Ended<br/>Supplemental Survey Items</i></b>  |          |             |          |             |          |             |          |             |          |             |          |             |       |             |
| Yes                                                         | 0        | 0           | 0        | 0           | 1        | 0           | 50       | 17          | 25       | 11          | 0        | 0           | 76    | 28          |
| No                                                          | 27       | 7           | 7        | 0           | 50       | 13          | 32       | 2           | 29       | 4           | 0        | 0           | 145   | 26          |
| Not applicable                                              | 3        | 1           | 9        | 0           | 121      | 51          | 9        | 5           | 62       | 19          | 2        | 2           | 206   | 78          |
| <b><i>Additional Market Names on<br/>Back of Survey</i></b> |          |             |          |             |          |             |          |             |          |             |          |             |       |             |
| Yes                                                         | 0        | 0           | 0        | 0           | 0        | 0           | 1        | 1           | 73       | 28          | 2        | 2           | 76    | 31          |
| No                                                          | 30       | 8           | 16       | 0           | 172      | 64          | 90       | 23          | 43       | 6           | 0        | 0           | 351   | 101         |

#### Appendix D. Beneficiary and Survey Characteristics at the Beneficiary Level

|                                                                         | N       | %    |
|-------------------------------------------------------------------------|---------|------|
| <b>Beneficiary characteristics</b>                                      |         |      |
| Age                                                                     |         |      |
| 18-34                                                                   | 6,975   | 1.4  |
| 35-44                                                                   | 11,655  | 2.4  |
| 45-54                                                                   | 23,122  | 4.7  |
| 55-64                                                                   | 49,278  | 10.1 |
| 65-69                                                                   | 96,197  | 19.7 |
| 70-74                                                                   | 113,348 | 23.2 |
| 75-79                                                                   | 79,475  | 16.3 |
| 80-84                                                                   | 52,484  | 10.7 |
| 85-89                                                                   | 33,777  | 6.9  |
| 90+                                                                     | 22,577  | 4.6  |
| Race/ethnicity                                                          |         |      |
| White                                                                   | 349,770 | 71.5 |
| Black                                                                   | 72,577  | 14.9 |
| Asian                                                                   | 18,891  | 3.9  |
| Hispanic                                                                | 26,868  | 5.5  |
| Other                                                                   | 20,782  | 4.3  |
| Male                                                                    | 207,030 | 42.4 |
| Dually eligible/receive Low-Income<br>Subsidy                           | 187,190 | 38.3 |
| Beale Code                                                              |         |      |
| 1 (most urban; county in metro area<br>of 1 million population or more) | 266,126 | 54.4 |

|                                                                              |                                  |              |
|------------------------------------------------------------------------------|----------------------------------|--------------|
| 2 (county in metro area of 250,000 to 1 million population)                  | 125,525                          | 25.7         |
| 3 (county in metro area of fewer than 250,000 population)                    | 40,744                           | 8.3          |
| 4 (county with urban population of 20,000 or more, adjacent to a metro area) | 20,340                           | 4.2          |
| 5-9 (most rural)                                                             | 36,153                           | 7.4          |
|                                                                              | <b>Mean (Standard Deviation)</b> | <b>Range</b> |
| <b>Survey characteristics (at the beneficiary level)</b>                     |                                  |              |
| Plan's 2010 response rate (%)                                                | 62.4 (10.1)                      | 25.8 – 81.6  |
| Page count                                                                   | 8.3 (1.1)                        | 7 - 12       |
| Number of supplemental items                                                 | 4.1 (5.2)                        | 0 - 19       |
|                                                                              | <b>N</b>                         | <b>%</b>     |
| Missing 2010 response rate                                                   | 197,970                          | 40.5         |
| Instructions at top of first page of survey (as opposed to a separate page)  | 765                              | 0.2          |
| Attractiveness                                                               |                                  |              |
| 1 (least attractive/easy to read)                                            | 136,354                          | 27.9         |
| 2                                                                            | 13,994                           | 2.9          |
| 3                                                                            | 313,792                          | 64.2         |
| 4 (most attractive/easy to read)                                             | 24,748                           | 5.1          |
| Any supplemental items                                                       | 250,274                          | 51.2         |
| Characteristics of supplemental items                                        |                                  |              |
| Any CAHPS                                                                    | 202,447                          | 41.4         |



|                                                                   |         |      |
|-------------------------------------------------------------------|---------|------|
| Any non-CAHPS                                                     | 205,240 | 42.0 |
| Any open-ended                                                    | 83,296  | 17.0 |
| Back of survey lists one or more<br>additional names for the plan | 95,572  | 19.6 |
| MA-Only survey                                                    | 21,011  | 4.3  |
| Vendor                                                            |         |      |
| 1                                                                 | 24,748  | 5.1  |
| 2                                                                 | 13,994  | 2.9  |
| 3                                                                 | 206,889 | 42.3 |
| 4                                                                 | 100,754 | 20.6 |
| 5                                                                 | 140,314 | 28.7 |
| 6                                                                 | 2,189   | 0.5  |

# Appendix E. Complete Results from Multivariate Model Predicting 2017 Survey Response from Plan-Level Survey

## Characteristics (488,888 Beneficiaries Sampled from 438 MA Plans)

|                                                                                              | OR (95% CI)               | p-value | sig |
|----------------------------------------------------------------------------------------------|---------------------------|---------|-----|
| Plan's 2010 response rate, per 10 percentage points                                          | 1.11<br>(1.08, 1.15)      | <.0001  | *** |
| Missing 2010 response rate                                                                   | 0.99<br>(0.95, 1.04)      | 0.7305  |     |
| Instructions at top of first page of survey (as opposed to a separate page)                  | 0.67<br>(0.56, 0.79)      | <.0001  | *** |
| Attractiveness (1=least attractive/easy to read to 4=most attractive/easy to read)           | 1.32<br>(1.15, 1.52)      | <.0001  | *** |
| Page count (recoded such that 0=modal value within survey type [8 for MA-PD, 7 for MA-Only]) | 0.91<br>(0.86, 0.95)      | <.0001  | *** |
| Number of supplemental items                                                                 | 0.98<br>(0.97, 0.99)      | 0.0004  | *** |
| Any supplemental items                                                                       | 0.87<br>(0.78, 0.98)      | 0.0268  | *   |
| Characteristics of supplemental items                                                        | p=0.0002 for omnibus test |         |     |
| Any CAHPS                                                                                    | 1.13<br>(1.01, 1.26)      | 0.0354  | *   |
| Any non-CAHPS                                                                                | 1.15<br>(1.05, 1.26)      | 0.0026  | **  |
| Any open-ended                                                                               | 1.08<br>(1.00, 1.17)      | 0.0579  |     |

|                                                                |                      |        |     |
|----------------------------------------------------------------|----------------------|--------|-----|
| Back of survey lists one or more additional names for the plan | 0.93<br>(0.86, 1.00) | 0.0482 | *   |
| MA-Only survey                                                 | 1.10<br>(1.06, 1.15) | <.0001 | *** |
| Vendor                                                         |                      |        |     |
| 1                                                              | 1.09<br>(0.95, 1.27) | 0.2216 |     |
| 2                                                              | 1.27<br>(1.06, 1.53) | 0.0104 | *   |
| 3 (omitted reference group)                                    | 1.00                 |        |     |
| 4                                                              | 0.90<br>(0.83, 0.97) | 0.0055 | **  |
| 5                                                              | 1.71<br>(1.35, 2.19) | <.0001 | *** |
| 6                                                              | 1.15<br>(0.87, 1.51) | 0.3213 |     |
| Beneficiary characteristics                                    |                      |        |     |
| Age                                                            |                      |        |     |
| 18-34                                                          | 0.41<br>(0.39, 0.44) | <.0001 | *** |
| 35-44                                                          | 0.47<br>(0.45, 0.49) | <.0001 | *** |
| 45-54                                                          | 0.62<br>(0.60, 0.64) | <.0001 | *** |

|                                 |                      |        |     |
|---------------------------------|----------------------|--------|-----|
| 55-64                           | 0.86<br>(0.84, 0.88) | <.0001 | *** |
| 65-69 (omitted reference group) | 1.00                 |        |     |
| 70-74                           | 1.11<br>(1.09, 1.13) | <.0001 | *** |
| 75-79                           | 1.24<br>(1.21, 1.26) | <.0001 | *** |
| 80-84                           | 1.28<br>(1.25, 1.30) | <.0001 | *** |
| 85-89                           | 1.17<br>(1.14, 1.20) | <.0001 | *** |
| 90+                             | 0.86<br>(0.84, 0.89) | <.0001 | *** |
| Race/ethnicity                  |                      |        |     |
| White (omitted reference group) | 1.00                 |        |     |
| Black                           | 0.87<br>(0.86, 0.89) | <.0001 | *** |
| Asian                           | 0.60<br>(0.58, 0.62) | <.0001 | *** |
| Hispanic                        | 0.80<br>(0.78, 0.83) | <.0001 | *** |
| Other                           | 0.81<br>(0.79, 0.84) | <.0001 | *** |
| Male                            | 0.94<br>(0.93, 0.95) | <.0001 | *** |

|                                                                            |                      |        |     |
|----------------------------------------------------------------------------|----------------------|--------|-----|
| Dually eligible/receive Low-Income Subsidy                                 | 1.03<br>(1.01, 1.05) | 0.0003 | *** |
| Beale Code (1=most urban, 5=most rural; values of 5 or greater coded as 5) | 1.06<br>(1.05, 1.06) | <.0001 | *** |

Model includes random effects for plans.

\*p<0.05, \*\*p<0.01, \*\*\*p<0.001

**Appendix F. Complete Results from Multivariate Model Predicting 2017 Survey Response, with Interactions of Beneficiary Age and Plan-Level Survey Characteristics (488,888 Beneficiaries Sampled from 438 MA Plans)**

|                                                                                              | <b>OR</b>                | <b>p-value</b> | <b>sig</b> |
|----------------------------------------------------------------------------------------------|--------------------------|----------------|------------|
| Plan's 2010 response rate, per 10 percentage points                                          | 1.09 (1.06, 1.12)        | <.0001         | ***        |
| Missing 2010 response rate                                                                   | 1.01 (0.96, 1.05)        | 0.8252         |            |
| Instructions at top of first page of survey (as opposed to a separate page)                  | 0.68 (0.57, 0.80)        | <.0001         | ***        |
| Attractiveness (1=least attractive/easy to read to 4=most attractive/easy to read)           | 1.17 (1.01, 1.35)        | 0.0312         | *          |
| Page count (recoded such that 0=modal value within survey type [8 for MA-PD, 7 for MA-Only]) | 0.93 (0.88, 0.99)        | 0.0298         | *          |
| Number of supplemental items                                                                 | 1.00 (0.99, 1.02)        | 0.4887         |            |
| Any supplemental items                                                                       | 0.87 (0.77, 0.98)        | 0.0225         | *          |
| Characteristics of supplemental items                                                        | p<.0001 for omnibus test |                |            |
| Any CAHPS                                                                                    | 1.14 (1.02, 1.27)        | 0.0228         | *          |
| Any non-CAHPS                                                                                | 1.15 (1.05, 1.27)        | 0.0027         | **         |
| Any open-ended                                                                               | 1.09 (1.00, 1.18)        | 0.0405         | *          |
| Back of survey lists one or more additional names for the plan                               | 0.95 (0.88, 1.03)        | 0.2229         |            |
| MA-Only survey                                                                               | 1.16 (1.12, 1.21)        | <.0001         | ***        |
| Vendor                                                                                       |                          |                |            |
| 1                                                                                            | 1.07 (0.92, 1.24)        | 0.3606         |            |
| 2                                                                                            | 1.29 (1.07, 1.55)        | 0.0067         | **         |
| 3 (omitted reference group)                                                                  | 1.00                     |                |            |

|                                                        |                   |        |     |
|--------------------------------------------------------|-------------------|--------|-----|
| 4                                                      | 0.90 (0.84, 0.97) | 0.0089 | **  |
| 5                                                      | 1.73 (1.35, 2.20) | <.0001 | *** |
| 6                                                      | 1.13 (0.86, 1.49) | 0.3814 |     |
| Beneficiary age                                        |                   |        |     |
| 18-34                                                  | 0.46 (0.42, 0.49) | <.0001 | *** |
| 35-44                                                  | 0.51 (0.48, 0.55) | <.0001 | *** |
| 45-54                                                  | 0.66 (0.64, 0.69) | <.0001 | *** |
| 55-64                                                  | 0.89 (0.86, 0.91) | <.0001 | *** |
| 65-69 (reference group)                                | 1.00              |        |     |
| 70-74                                                  | 1.05 (1.03, 1.08) | <.0001 | *** |
| 75-79                                                  | 1.12 (1.08, 1.16) | <.0001 | *** |
| 80-84                                                  | 1.11 (1.06, 1.16) | <.0001 | *** |
| 85-89                                                  | 0.97 (0.92, 1.03) | 0.3614 |     |
| 90+                                                    | 0.69 (0.64, 0.74) | <.0001 | *** |
| Linear age category x survey characteristics           |                   |        |     |
| Joint test for all interactions (3 degrees of freedom) |                   | <.0001 | *** |
| Age x attractiveness                                   | 1.02 (1.02, 1.03) | <.0001 | *** |
| Age x page count                                       | 0.99 (0.99, 1.00) | 0.0230 | *   |
| Age x number of supplemental items                     | 1.00 (1.00, 1.00) | <.0001 | *** |
| Other beneficiary characteristics                      |                   |        |     |
| Race/ethnicity                                         |                   |        |     |
| White (omitted reference group)                        | 1.00              |        |     |
| Black                                                  | 0.87 (0.86, 0.89) | <.0001 | *** |
| Asian                                                  | 0.60 (0.58, 0.62) | <.0001 | *** |
| Hispanic                                               | 0.80 (0.78, 0.83) | <.0001 | *** |
| Other                                                  | 0.82 (0.80, 0.85) | <.0001 | *** |

|                                                                            |                   |        |     |
|----------------------------------------------------------------------------|-------------------|--------|-----|
| Male                                                                       | 0.93 (0.92, 0.95) | <.0001 | *** |
| Dually eligible/receive Low-Income Subsidy                                 | 1.04 (1.02, 1.06) | <.0001 | *** |
| Beale Code (1=most urban, 5=most rural; values of 5 or greater coded as 5) | 1.06 (1.05, 1.06) | <.0001 | *** |

Model includes random effects for plans.

\*p<0.05, \*\*p<0.01, \*\*\*p<0.001
